# Supplementary material
Source: MDPI journal article supplement (https://www.mdpi.com/1999-4907/9/10/635)
Supplement: s1 [file s1]

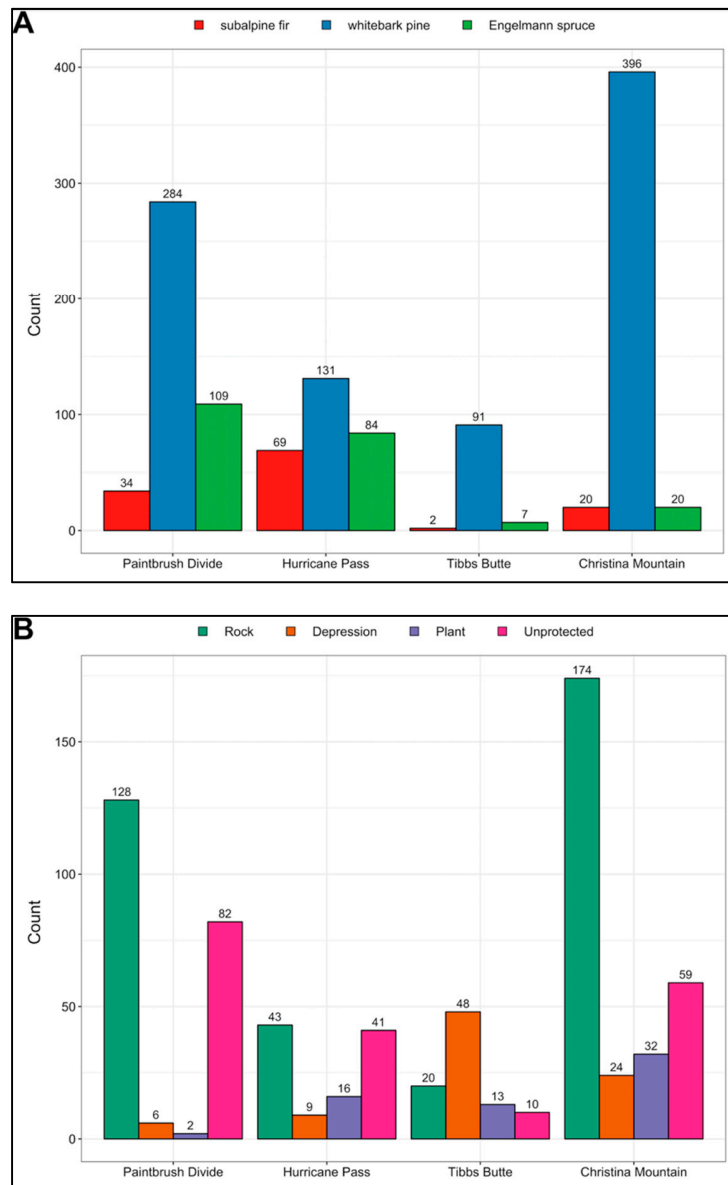

**Figure S1.** (A) Total conifer counts by species for each study area. (B) Total nurse object and unprotected site counts.
